# Supplementary material for: Spectral selectivity of 3D magnetophotonic crystal film fabricated from single butterfly wing scales
Source: Royal Society of Chemistry journal article supplement (doi:10.1039/c4nr00477a), 2014-01-01
Supplement: c4nr00477a1.pdf [file c4nr00477a1.pdf]

## Supporting information

### Spectral selectivity of 3D magnetophotonic crystal film fabricated from butterfly wing scale

Wenhong Peng,<sup>a</sup> Shenmin Zhu,<sup>a \*</sup> Wang Zhang,<sup>a</sup> Qingqing Yang,<sup>a</sup> Di Zhang,<sup>a \*</sup> Zhixin Chen<sup>b</sup>

<sup>a</sup> State Key Lab of Metal Matrix Composite, Shanghai Jiao Tong University Shanghai, 200240, (China) E-mail: smzhu@sjtu.edu.cn; zhangdi@sjtu.edu.cn

<sup>b</sup> Faculty of Engineering and Information science, University of Wollongong, Wollongong, NSW, 2522, (Australia)

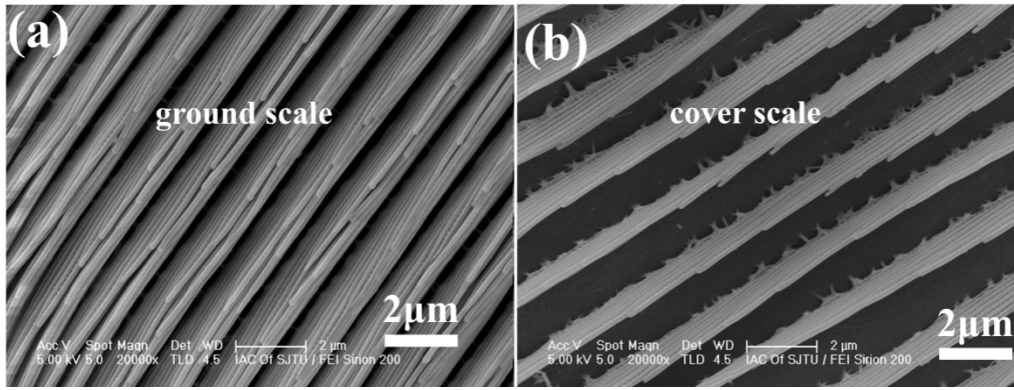

Fig. S1 SEM images of ground scale and cover scale

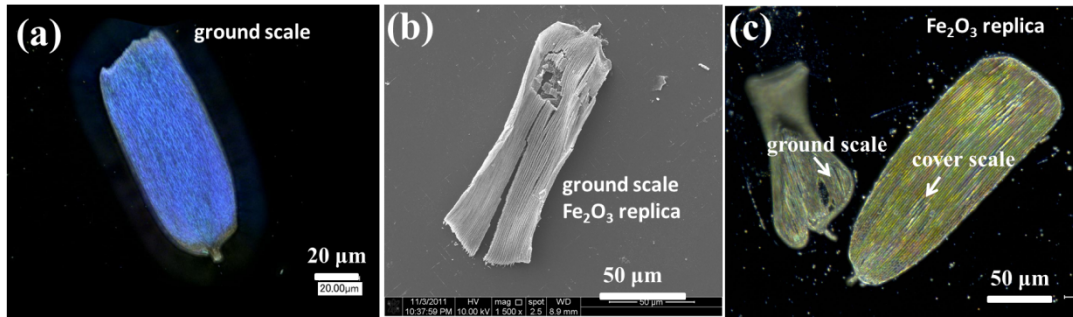

Fig. S2 optical image of natural ground scale (a), Fe<sub>2</sub>O<sub>3</sub> replica of ground scale(b), optical image of Fe<sub>2</sub>O<sub>3</sub> replica(c). Cover scale in (c) is list as comparison.

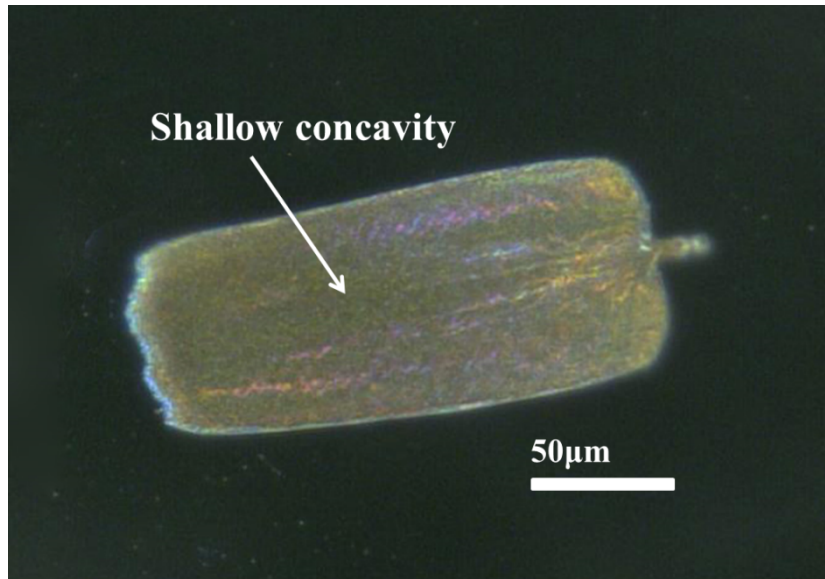

Fig. S3. Back of the ground scale

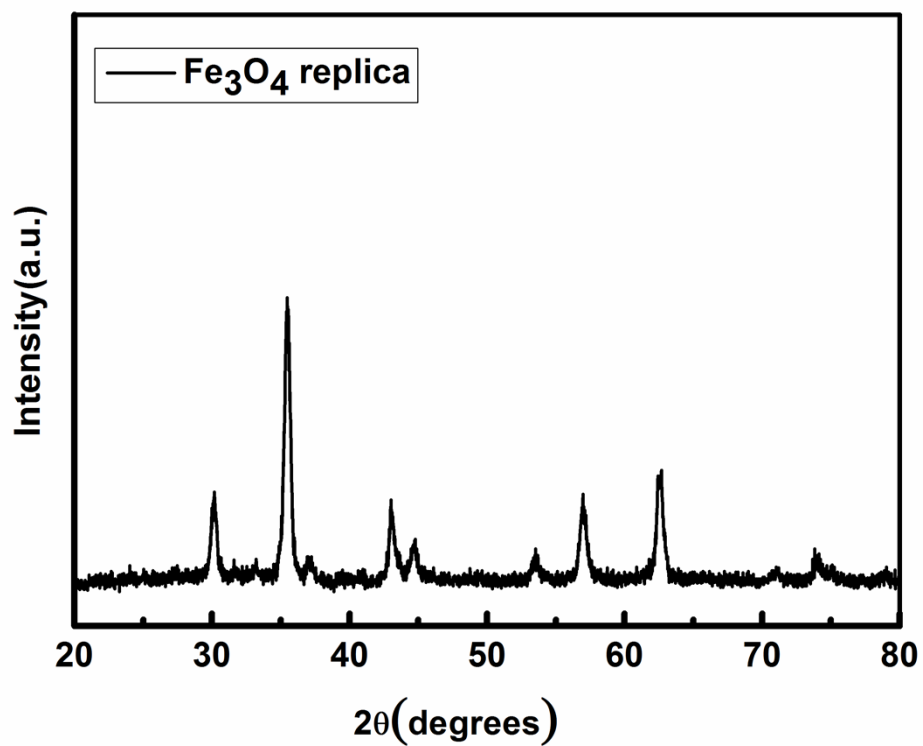

Fig. S4 XRD pattern of the Fe<sub>3</sub>O<sub>4</sub> replica from a whole butterfly wing
